# Supplementary material for: A Peptidisc-Based Survey of the Plasma Membrane Proteome of a Mammalian Cell
Source: PubMed Central journal article supplement (PMC10416069; doi:10.1016/j.mcpro.2023.100588), 2023-06-07

**A****Purified Library replicates (Panc-1)**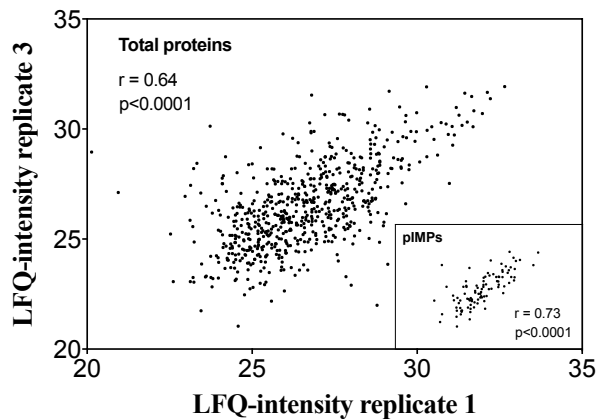**Purified Library replicates (Panc-1)**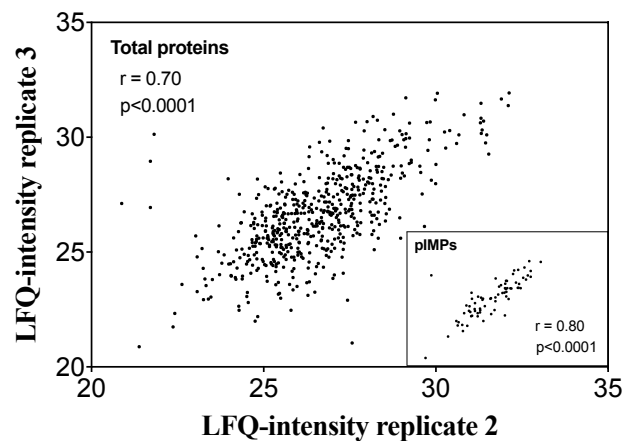**B****Purified Library replicates (hPSC)**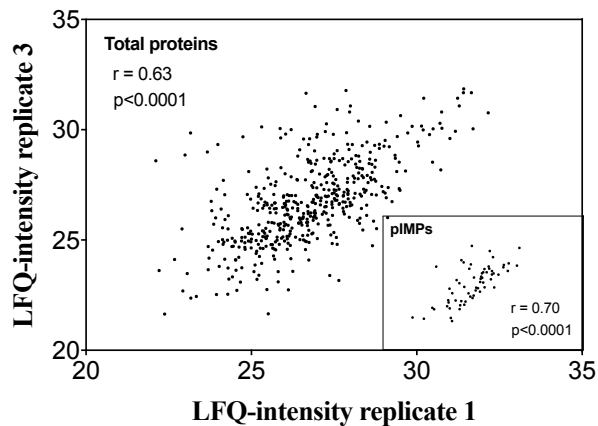**Purified Library replicates (hPSC)**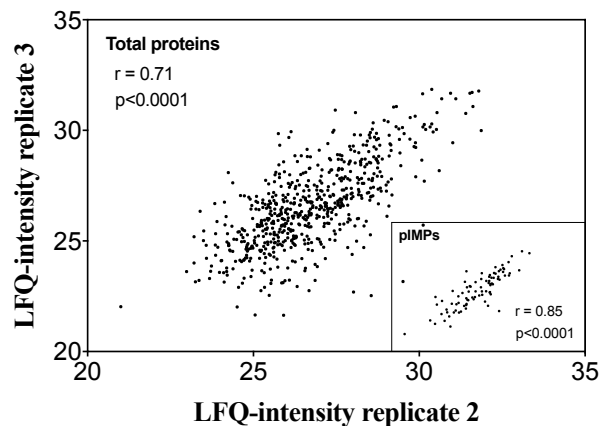

Supplement: mmc8.pdf [file mmc8.pdf]
