# Supplementary material for: A Peptidisc-Based Survey of the Plasma Membrane Proteome of a Mammalian Cell
Source: PubMed Central journal article supplement (PMC10416069; doi:10.1016/j.mcpro.2023.100588), 2023-06-07

# PDAC Transcriptomics DepMap

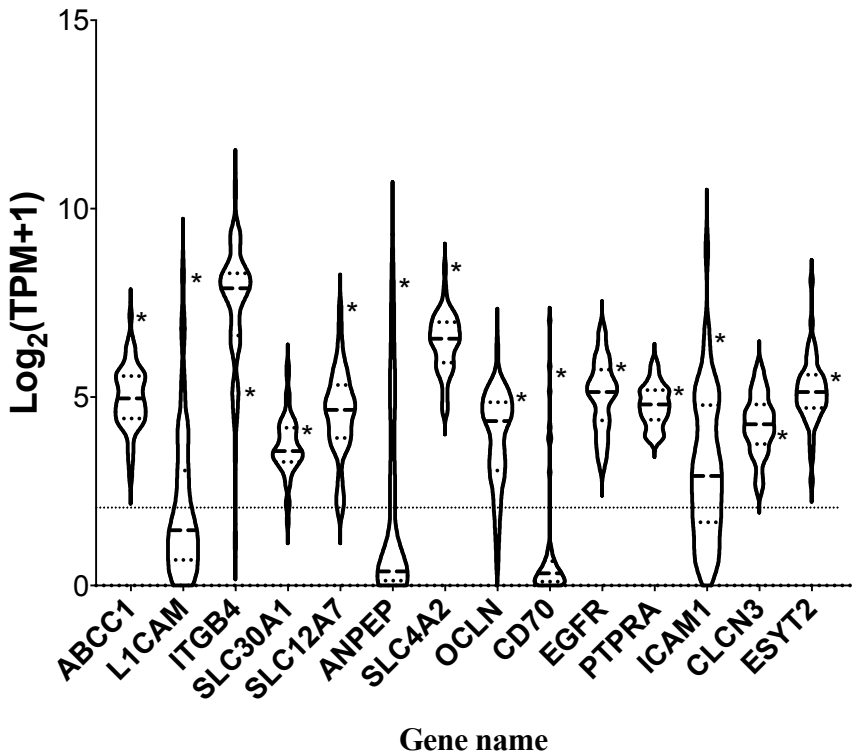

Supplement: mmc9.pdf [file mmc9.pdf]
